# Supplementary material for: Availability of Family Caregiver Programs in US Cancer Centers
Source: PubMed Central journal article supplement (PMC10568368; doi:10.1001/jamanetworkopen.2023.37250), 2023-10-11
Supplement: jamanetwopen-e2337250-s002.pdf [file jamanetwopen-e2337250-s002.pdf]

## Data Sharing Statement

Odom. Availability of Family Caregiver Programs in US Cancer Centers. *JAMA Netw Open*. Published October 11, 2023. doi:10.1001/jamanetworkopen.2023.37250

### Data

**Data available:** No

### Additional Information

**Explanation for why data not available:** De-identified data will be made available upon reasonable request from the corresponding author.
